# Supplementary material for: Xenin, a Gastrointestinal Peptide, Regulates Feeding Independent of the Melanocortin Signaling Pathway
Source: Oxford University Press journal article supplement (doi:10.2337/db08-0260), 2008-11-05

**Supplemental Data**

**Supplemental Table 1. Primer sequences used for real-time PCR**

| Gene | Accession No. | Primer | Sequences | Exon |
| --- | --- | --- | --- | --- |
| c-fos | NM_010234 | Forward | 5’-GACAGCCTTTCCTACTACCATTCC-3’ | 1 |
|  |  | Reverse | 5’-GGACAGATCTGCGCAAAAGTC-3’ | 2 |
| POMC | NM_008895 | Forward | 5’-GCCCTCCTGCTTCAGACCTC-3’ | 2 |
|  |  | Reverse | 5’-CTTCCGGGGGTTTTCAGTCAG-3’ | 3 |
| AGRP | NM_007427 | Forward | 5'-TgACTgCAATgTTgCTgAgTTgTg-3' | 3 |
|  |  | Reverse | 5’-TTGAAGAAGCGGCAGTAGCACGT-3’ | 5 |
| Cyclophilin | X52803 | Forward | 5′-AAGCATACAGGTCCTGGCATCT-3′ | 4 |
|  |  | Reverse | 5′-TGCCATCCAGCCATTCAGT-3′ | 4-5 |

**Supplemental FIG. 1.** Effect of melanocortin antagonist on melanocortin agonist-induced anorexia. Male C57BL/6 mice were fasted overnight (16 hours) and injected i.c.v. with aCSF or SHU9119 (0.5 nmol) immediately before i.c.v. injection of MTII (0.1 nmol, Phoenix Pharmaceutical) or aCSF. Mice were allowed access to food immediately after injection. Cumulative food intake was measured 2 hours after injection. Data are means ± SEM (n = 4/group). Groups that do not share a common letter are significantly different (*P* < 0.05, Tukey-Kramer test).


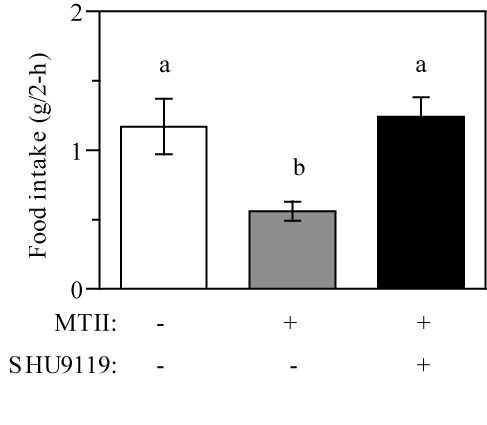

Supplement: db08-02601_suppl.doc [file db08-02601_suppl.doc]
